# Supplementary material
Source: PubMed Central journal article supplement (PMC9867571)

## Supplementary Digital Content

### 1. List of LAS VEGAS study Network Collaborators

#### Austria

**LKH Graz, Graz:** Wolfgang Kroell, Helfried Metzler, Gerd Struber, Thomas Wegscheider

**AKH Linz, Linz:** Hans Gombotz

**Medical University Vienna:** Michael Hiesmayr, Werner Schmid, Bernhard Urbanek

#### Belgium

**UCL - Cliniques Universitaires Saint Luc Brussels:** David Kahn, Mona Momeni, Audrey Pospiech, Fernande Lois, Patrice Forget, Irina Grosu

**University Hospital Brussels (UZ Brussel):** Jan Poelaert, Veerle van Mossevelde, Marie-Claire van Malderen

**Het Ziekenhuis Oost Limburg (ZOL), Genk:** Dimitri Dylst, Jeroen van Melkebeek, Maud Beran

**Ghent University Hospital, Gent:** Stefan de Hert, Luc De Baerdemaeker, Bjorn Heyse, Jurgen Van Limmen, Piet Wyffels, Tom Jacobs, Nathalie Roels, Ann De Bruyne

**Maria Middelaers, Gent:** Stijn van de Velde

**European Society of Anaesthesiology, Brussels:** Brigitte Leva, Sandrine Damster, Benoit Plichon

#### Bosnia and Herzegovina

**General Hospital “prim Dr Abdulah Nakas” Sarajevo:** Marina Juros-Zovko, Dejana Djonović-Omanović

#### Croatia

**General Hospital Cakovec, Cakovec:** Selma Pernar

**General Hospital Karlovac, Karlovac:** Josip Zunic, Petar Miskovic, Antonio Zilic  
**University Clinical Hospital Osijek, Osijek:** Slavica Kvolik, Dubravka Ivic, Darija Azenic-Venzera, Sonja Skiljic, Hrvoje Vinkovic, Ivana Oputric

**University Hospital Rijeka, Rijeka:** Kazimir Juricic, Vedran Frkovic

**General Hospital Dr J Bencevic, Slavonski Brod:** Jasminka Kopic, Ivan Mirkovic

**University Hospital Center Split, Split:** Nenad Karanovic, Mladen Carev, Natasa Dropulic

**University Hospital Merkur, Zagreb:** Jadranka Pavicic Saric, Gorjana Erceg, Matea Bogdanovic Dvorscak

**University Hospital Sveti Duh, Zagreb:** Branka Mazul-Sunko, Anna Marija Pavicic, Tanja Goranovic

**University Hospital, Medical school, "Sestre milosrdnice" (Sister of Charity),**

**Zagreb:** Branka Maldini, Tomislav Radocaj, Zeljka Gavranovic, Inga Mladic-Batinica, Mirna Sehovic

#### Czech Republic

**University Hospital Brno, Brno:** Petr Stourac, Hana Harazim, Olga Smekalova, Martina Kosinova, Tomas Kolacek, Kamil Hudacek, Michal Drab

**University Hospital Hradec Kralove, Hradec Kralove:** Jan Brujevic, Katerina Vitkova, Katerina Jirmanova

**University Hospital Ostrava, Ostrava:** Ivana Volfova, Paula Dzurnakova, Katarina Liskova

**Nemocnice Znojmo, Znojmo:** Radovan Dudas, Radek Filipicky

#### Egypt

**El Sahel Teaching hospital, Cairo:** Samir el Kafrawy

**Kasr Al-Ainy Medical School, Cairo University:** Hisham Hosny Abdelwahab, Tarek Metwally, Ahmed Abdel-Razek

**Beni Sueif University Hospital, Giza:** Ahmed Mostafa El-Shaarawy, Wael Fathy Hasan, Ahmed Gouda Ahmed

**Fayoum University Hospital, Giza:** Hany Yassin, Mohamed Magdy, Mahdy Abdelhady

**Suis medical Insurance Hospital, Suis:** Mohamed Mahran

#### Estonia

**North Estonia Medical Center, Tallinn:** Eiko Herodes, Peeter Kivik, Juri Oganjan, Annika Aun

**Tartu University Hospital, Tartu:** Alar Sormus, Kaili Sarapuu, Merilin Mall, Juri Karjagin

#### France

**University Hospital of Clermont-Ferrand, Clermont-Ferrand:** Emmanuel Futier, Antoine Petit, Adeline Gerard

**Institut Hospitalier Franco-Britannique, Levallois-Perret:** Emmanuel Marret, Marc Solier

**Saint Eloi University Hospital, Montpellier:** Samir Jaber, Albert Prades

#### Germany

**Fachkrankenhaus Coswig, Coswig:** Jens Krassler, Simone Merzky

**University Hospital Carl Gustav Carus, Dresden:** Christopher Uhlig, Thomas Kiss, Anette Bundy, Thomas Bluth, Andreas Gueldner, Peter Spieth, Martin Scharffenberg, Denny Tran Thiem, Thea Koch, Marcelo Gama de Abreu

**Duesseldorf University Hospital, Heinrich-Heine University:** Tanja Treschan, Maximilian Schaefer,

Bea Bastin, Johann Geib, Martin Weiss, Peter Kienbaum, Benedikt Pannen

**Diakoniekrankenhaus Friederikenstift, Hannover:** Andre Gottschalk, Mirja Konrad, Diana Westerheide, Ben Schwerdtfeger

**University of Leipzig, Leipzig:** Hermann Wrigge, Philipp Simon, Andreas Reske, Christian Nestler

#### Greece

**“Alexandra” general hospital of Athens, Athens:** Dimitrios Valsamidis, Konstantinos Stroumpoulis

**General air force hospital, Athens:** Georgios Antholopoulos, Antonis Andreou, Dimitris Karapanos

**Aretaieion University Hospital, Athens:** Kassiani Theodoraki, Georgios Gkiokas, Marios-Konstantinos Tasoulis

**Attikon University Hospital, Athens:** Tatiana Sidiropoulou, Foteini Zafeiropoulou, Panagiota Florou, Aggeliki Pandazi

**Ahepa University Hospital Thessaloniki, Thessaloniki:** Georgia Tsaousi, Christos Nouris, Chryssa Pourzitaki,

Israel

**The Lady Davis Carmel Medical Center, Haifa:** Dmitri Bystritski, Reuven Pizov, Arie Eden

Italy

**Ospedale San. Paolo Bari, Bari:** Caterina Valeria Pesce, Annamaria Campanile, Antonella Marrella

**University of Bari "Aldo Moro", Bari:** Salvatore Grasso, Michele De Michele

**Institute for Cancer Research and treatment, Candiolo, Turin:** Francesco Bona, Gianmarco Giacoletto, Elena Sardo

**Azienda Ospedaliera per l'emergenza Cannizzaro, Catania:** Luigi Giancarlo, Vicari Sottosanti

**Ospedale Melegnano, Cernusco, Milano:** Maurizio Solca

**Azienda Ospedaliera – Universitaria Sant'Anna, Ferrara:** Carlo Alberto Volta, Savino Spadaro, Marco Verri, Riccardo Ragazzi, Roberto Zoppellari

**Ospedali Riuniti Di Foggia - University of Foggia, Foggia:** Gilda Cinnella, Pasquale Raimondo, Daniela La Bella, Lucia Mirabella, Davide D'antini

**IRCCS AOU San Martino IST Hospital, University of Genoa, Genoa:** Paolo Pelosi, Alexandre Molin, Iole Brunetti, Angelo Gratarola, Giulia Pellerano, Rosanna Sileo, Stefano Pezzatto, Luca Montagnani

**IRCCS San Raffaele Scientific Institute, Milano:** Laura Pasin, Giovanni Landoni, Alberto Zangrillo, Luigi Beretta, Ambra Licia Di Parma, Valentina Tarzia, Roberto Dossi, Marta Eugenia Sassone

**Istituto europeo di oncologia – ieo, Milano:** Daniele Sances, Stefano Tredici, Gianluca Spano, Gianluca Castellani, Luigi Delunas, Sopio Peradze, Marco Venturino

**Ospedale Niguarda Ca'Granda Milano, Milano:** Ines Arpino, Sara Sher

**Ospedale San Paolo - University of Milano, Milano:** Concezione Tommasino, Francesca Rapido, Paola Morelli

**University of Naples "Federico II" Naples:** Maria Vargas, Giuseppe Servillo

***Policlinico "P. Giaccone", Palermo:*** Andrea Cortegiani, Santi Maurizio Raineri, Francesca Montalto, Vincenzo Russotto, Antonino Giarratano

***Azienda Ospedaliero-Universitaria, Parma:*** Marco Baciarello, Michela Generali, Giorgia Cerati

***Santa Maria degli Angeli, Pordenone:*** Yigal Leykin

***Ospedale Misericordia e Dolce - Us14 Prato, Prato:*** Filippo Bressan, Vittoria Bartolini, Lucia Zamidei

***University hospital of Sassari, Sassari:*** Luca Brazzi, Corrado Liperi, Gabriele Sales, Laura Pistidda

***Insubria University, Varese:*** Paolo Severgnini, Elisa Brugnoli, Giuseppe Musella, Alessandro Bacuzzi

#### Republic of Kosovo

***Distric hospital Gjakova, Gjakove:*** Dalip Muhardri

***University Clinical Center of Kosova, Prishtina:*** Agreta Gecaj-Gashi, Fatos Sada

***Regional Hospital "Prim.Dr. Daut Mustafa", Prizren:*** Adem Bytyqi

#### Lithuania

***Medical University Hospital, Hospital of Lithuanian University of Health***

***Sciences, Kaunas:*** Aurika Karbonskiene, Ruta Aukstakalniene, Zivile Teberaite, Erika Salciute

***Vilnius University Hospital - Institute of Oncology, Vilnius:*** Renatas Tikuisis, Povilas Miliauskas

***Vilnius University Hospital - Santariskiu Clinics, Vilnius:*** Sipylaite Jurate, Egle Kontrimaviciute, Gabija Tomkute

#### Malta

***Mater Dei Hospital, Msida:*** John Xuereb, Maureen Bezzina, Francis Joseph Borg

#### Netherlands

***Academic Medical Centre, University of Amsterdam:*** Sabrine Hemmes, Marcus Schultz, Markus Hollmann, Irene Wiersma, Jan Binnekade, Lieuwe Bos

***VU University Medical Center, Amsterdam:*** Christa Boer, Anne Duvekot

**MC Haaglanden, Den Haag:** Bas in 't Veld, Alice Werger, Paul Dennesen, Charlotte Severijns

**Westfriesgasthuis, Hoorn:** Jasper De Jong, Jens Hering, Rienk van Beek

#### Norway

**Haukeland University Hospital, Bergen:** Stefan Ivars, Ib Jammer

**Førde Central Hospital /Førde Sentral Sykehus, Førde:** Alena Breidablik

**Martina Hansens Hospital, Gjøttum:** Katharina Skirstad Hodt, Frode Fjellanger, Manuel Vico Avalos

**Bærum Hospital, Vestre Viken, Rud:** Jannicke Mellin-Olsen, Elisabeth Andersson

**Stavanger University Hospital, Stavanger:** Amir Shafi-Kabiri

#### Panama

**Hospital Santo Tomás, Panama:** Ruby Molina, Stanley Wutai, Erick Morais

#### Portugal

**Hospital do Espírito Santo - Évora, E.P.E, Évora.:** Glória Tareco, Daniel Ferreira, Joana Amaral

**Centro Hospitalar de Lisboa Central, E.P.E, Lisboa.:** Maria de Lurdes Goncalves Castro, Susana Cadilha, Sofia Appleton

**Centro Hospitalar de Lisboa Ocidental, E.P.E. Hospital de S. Francisco Xavier, Lisboa:** Suzana Parente, Mariana Correia, Diogo Martins

**Santarem Hospital, Santarem:** Angela Monteiro, Ana Ricardo, Sara Rodrigues

#### Romania

**Spital Orasenesc, Bolintin Vale:** Lucian Horhota

**Clinical Emergency Hospital of Bucharest, Bucharest:** Ioana Marina Grintescu, Liliana Mirea, Ioana Cristina Grintescu

**Elias University Emergency Hospital, Bucharest:** Dan Corneci, Silvius Negoita, Madalina Dutu, Ioana Popescu Garotescu

**Emergency Institute of Cardiovascular Diseases Inst. "Prof. C. C. Iliescu", Bucharest:** Daniela Filipescu, Alexandru Bogdan Prodan

**Fundeni Clinical institute - Anaesthesia and Intensive Care, Bucharest:** Gabriela Droc, Ruxandra Fota, Mihai Popescu

**Fundeni Clinical institute - Intensive Care Unit, Bucharest:** Dana Tomescu, Ana Maria Petcu, Marian Irinel Tudoroiu

**Hospital Profesor D Gerota, Bucharest:** Alida Moise, Catalin-Traian Guran

**Constanta County Emergency Hospital, Constanta:** Irel Gherghina, Dan Costea, Iulia Cindea

**University Emergency County Hospital Targu Mures, Targu Mures:** Sanda-Maria Copotiu, Ruxandra Copotiu, Victoria Barsan, Zsolt Tolcser, Magda Riciu, Septimiu Gheorghe Moldovan, Mihaly Veres

### Russia

**Krasnoyarsk State Medical University, Krasnoyarsk:** Alexey Gritsan, Tatyana Kapkan, Galina Gritsan, Oleg Korolkov

**Burdenko Neurosurgery Institute, Moscow:** Alexander Kulikov, Andrey Lubnin

**Moscow Regional Research Clinical Institute, Moscow:** Alexey Ovezov, Pavel Prokoshev, Alexander Lugovoy, Natalia Anipchenko

**Municipal Clinical Hospital 7, Moscow:** Andrey Babayants, Irina Komissarova, Karginova Zalina

**Reanimatology Research Institute n.a. Negovskij RAMS, Moscow:** Valery Likhvantsev, Sergei Fedorov

### Serbia

**Clinical Center of Vojvodina, Emergency Center, Novisad:** Aleksandra Lazukic, Jasmina Pejakovic, Dunja Mihajlovic

### Slovakia

**National Cancer Institute, Bratislava:** Zuzana Kusnierikova, Maria Zelinkova

**F.D. Roosevelt teaching Hospital, Banská Bystrica:** Katarina Bruncakova, Lenka Polakovicova

**Faculty Hospital Nové Zámky, Nové Zámky:** Villiam Sobona

### Slovenia

**Institute of Oncology Ljubljana, Ljubljana:** Barbka Novak-Supe, Ana Pekle-Golez, Miroljub Jovanov, Branka Strazisar

**University Medical Centre Ljubljana, Ljubljana:** Jasmina Markovic-Bozic, Vesna Novak-Jankovic, Minca Voje, Andriy Grynyuk, Ivan Kostadinov, Alenka Spindler-Vesel

#### Spain

**Hospital Sant Pau, Barcelona:** Victoria Moral, Mari Carmen Unzueta, Carlos Puigbo, Josep Fava

**Hospital Universitari Germans Trias I Pujol, Barcelona:** Jaume Canet, Enrique Moret, Mónica Rodríguez Nunez, Mar Sendra, Andrea Brunelli, Frederic Rodenas

**University of Navarra, Pamplona:** Pablo Monedero, Francisco Hidalgo Martinez, Maria Jose Yepes Temino, Antonio Martínez Simon, Ana de Abajo Larriba

**Corporacion Sanitaria Parc Tauli, Sabadell:** Alberto Lisi, Gisela Perez, Raquel Martinez

**Consorcio Hospital General Universitario de Valencia, Valencia:** Manuel Granell, Jose Tatay Vivo, Cristina Saiz Ruiz, Jose Antonio de Andrés Ibañez

**Hospital Clinico Valencia, Valencia:** Ernesto Pastor, Marina Soro, Carlos Ferrando, Mario Defez

**Hospital Universitario Rio Hortega, Valladolid:** Cesar Aldecoa Alvares-Santullano, Rocio Perez, Jesus Rico

#### Sweden

**Central Hospital in Kristianstad:** Monir Jawad, Yousif Saeed, Lars Gillberg

#### Turkey

**Ufuk University Hospital Ankara, Ankara:** Zuleyha Kazak Bengisun, Baturay Kansu Kazbek

**Akdeniz University Hospital, Antalya:** Nesil Coskunfirat, Neval Boztug, Suat Sanli, Murat Yilmaz, Necmiye Hadimioglu

**Istanbul University, Istanbul medical faculty, Istanbul:** Nuzhet Mert Senturk, Emre Camci, Semra Kucukgoncu, Zerrin Sungur, Nukhet Sivrikoz

**Acibadem University, Istanbul:** Serpil Ustalar Ozgen, Fevzi Toraman

**Maltepe University, Istanbul:** Onur Selvi, Ozgur Senturk, Mine Yildiz

**Dokuz Eylül Üniversitesi Tıp Fakültesi, İzmir:** Bahar Kuvaki, Ferim Gunenc, Semih Kucukguclu, Şule Ozbilgin



***Şifa University Hospital, İzmir:*** Jale Maral, Seyda Canli

***Selcuk University faculty of medicine, Konya:*** Oguzhan Arun, Ali Saltali, Eyup Aydogan

***Fatih Sultan Mehmet Eğitim Ve Araştırma Hastanesi, Istanbul:*** Fatma Nur Akgun, Ceren Sanlikarip, Fatma Mine Karaman

#### Ukraine

***Institute Of Surgery And Transplantology, Kiev:*** Andriy Mazur

***Zaporizhzhia State Medical University, Zaporizhzhia:*** Sergiy Vorotyntsev

#### United Kingdom

SWARM Research Collaborative: for full list of SWARM contributors please see [www.ukswarm.com](http://www.ukswarm.com)

***Northern Devon Healthcare NHS Trust, Barnstaple:*** Guy Rousseau, Colin Barrett, Lucia Stancombe

***Golden Jubilee National Hospital, Clydebank, Scotland:*** Ben Shelley, Helen Scholes

***Darlington Memorial Hospital, County Durham and Darlington Foundation NHS Trust, Darlington:*** James Limb, Amir Rafi, Lisa Wayman, Jill Deane

***Royal Derby Hospital, Derby:*** David Rogerson, John Williams, Susan Yates, Elaine Rogers

***Dorset County Hospital, Dorchester:*** Mark Pulletz, Sarah Moreton, Stephanie Jones

***The Princess Alexandra NHS Hospital Trust, Essex:*** Suresh Venkatesh, Maudrian Burton, Lucy Brown, Cait Goodall

***Royal Devon and Exeter NHS Foundation Trust, Exeter:*** Matthew Rucklidge, Debbie Fuller, Maria Nadolski, Sandeep Kusre

***Hospital James Paget University Hospital NHS Foundation Trust, Great Yarmouth:*** Michael Lundberg, Lynn Everett, Helen Nutt

***Royal Surrey County Hospital NHS Foundation Trust, Guildford:*** Maka Zuleika, Peter Carvalho, Deborah Clements, Ben Creagh-Brown

***Kettering General Hospital NHS Foundation Trust, Kettering:*** Philip Watt, Parizade Raymode

**Barts Health NHS Trust, Royal London Hospital, London:** Rupert Pearse, Otto Mohr, Ashok Raj, Thais Creary

**Newcastle Upon Tyne Hospitals NHS Trust The Freeman Hospital High Heaton, Newcastle upon Tyne:** Ahmed Chishti, Andrea Bell, Charley Higham, Alistair Cain, Sarah Gibb, Stephen Mowat

**Derriford Hospital Plymouth Hospitals NHS Trust, Plymouth:** Danielle Franklin, Claire West, Gary Minto, Nicholas Boyd

**Royal Hallamshire Hospital, Sheffield:** Gary Mills, Emily Calton, Rachel Walker, Felicity Mackenzie, Branwen Ellison, Helen Roberts

**Mid Staffordshire NHS, Stafford:** Moses Chikungwa, Clare Jackson

**Musgrove Park Hospital, Taunton:** Andrew Donovan, Jayne Foot, Elizabeth Homan

**South Devon Healthcare NHS Foundation Trust /Torbay Hospital, Torquay, Torbay:** Jane Montgomery, David Portch, Pauline Mercer, Janet Palmer

**Royal Cornwall Hospital, Truro:** Jonathan Paddle, Anna Fouracres, Amanda Datson, Alyson Andrew, Leanne Welch

**Mid Yorkshire Hospitals NHS Trust; Pinderfields Hospital, Wakefield:** Alastair Rose, Sandeep Varma, Karen Simeson

**Sandwell and West Birmingham NHS Trust, West Bromich:** Mrutyunjaya Rambhatla, Jaysimha Susarla, Sudhakar Marri, Krishnan Kodaganallur, Ashok Das, Shivarajan Algarsamy, Julie Colley

**York Teaching Hospitals NHS Foundation Trust, York:** Simon Davies, Margaret Szewczyk, Thomas Smith

#### United States

**University of Colorado School of Medicine/University of Colorado Hospital, Aurora:** Ana Fernandez- Bustamante, Elizabeth Luzier, Angela Almagro

**Massachusetts General Hospital, Boston:** Marcos Vidal Melo, Luiz Fernando, Demet Sulemanji

**Mayo Clinic, Rochester:** Juraj Sprung, Toby Weingarten, Daryl Kor, Federica Scavonetto, Yeo Tze

## 2. Supplementary data

eTable 1: Baseline and intraoperative characteristics unmatched cohort (sensitivity analysis)

|                                              | <b>Anaemia</b><br>♀: Hb < 12<br>♂: Hb < 13<br>(n = 1644) | <b>No anaemia</b><br>♀: Hb ≥ 12<br>♂: Hb ≥ 13<br>(n = 6617) | <b>P value</b> |
|----------------------------------------------|----------------------------------------------------------|-------------------------------------------------------------|----------------|
| Age, years                                   | 59.0 [43.0 to 73.0]                                      | 53.0 [40.0 - 65.0]                                          | <0.001         |
| Female gender                                | 906 (55.1)                                               | 3663 (55.4)                                                 | 0.878          |
| Body mass index, kg m <sup>-2</sup>          | 25.3 [22.5 to 28.7]                                      | 26.5 [23.6 to 30.1]                                         | <0.001         |
| ASA                                          | 2.0 [2.0 to 3.0]                                         | 2.0 [1.0 to 2.0]                                            | <0.001         |
| Anaemia category                             |                                                          |                                                             | <0.001         |
| No anaemia (Hb >12♀; >13♂)                   | 0 (0.0)                                                  | 6617 (100.0)                                                |                |
| Mild anaemia (Hb 11–11.9♀; 11–12.9♂)         | 1009 (61.4)                                              | 0 (0.0)                                                     |                |
| Moderate anaemia (Hb 8–10.9)                 | 608 (37.0)                                               | 0 (0.0)                                                     |                |
| Severe anaemia (Hb<8)                        | 27 (1.6)                                                 | 0 (0.0)                                                     |                |
| ARISCAT                                      | 26.0 [15.0 to 40.2]                                      | 15.0 [3.0 to 26.0]                                          | <0.001         |
| Functional status                            |                                                          |                                                             | <0.001         |
| Independent                                  | 1351 (82.3)                                              | 6237 (94.3)                                                 |                |
| Partially dependent                          | 240 (14.6)                                               | 319 (4.8)                                                   |                |
| Totally dependent                            | 51 (3.1)                                                 | 59 (0.9)                                                    |                |
| COPD                                         | 127 (7.7)                                                | 396 (6.0)                                                   | 0.011          |
| Cancer                                       | 171 (10.4)                                               | 203 (3.1)                                                   | <0.001         |
| Chronic kidney failure                       | 154 (9.4)                                                | 134 (2.0)                                                   | <0.001         |
| Heart failure                                | 188 (11.4)                                               | 363 (5.5)                                                   | <0.001         |
| Preoperative red blood cell transfusion      | 69 (4.2)                                                 | 5 (0.1)                                                     | <0.001         |
| Preoperative haemoglobin, g dL <sup>-1</sup> | 11.3 [10.4 to 11.8]                                      | 14.1 [13.3 to 15.1]                                         | <0.001         |
| Condition surgery                            |                                                          |                                                             | <0.001         |
| Elective                                     | 1295 (78.8)                                              | 5959 (90.1)                                                 |                |
| Urgency                                      | 268 (16.3)                                               | 510 (7.7)                                                   |                |
| Emergency                                    | 81 (4.9)                                                 | 146 (2.2)                                                   |                |
| Surgical technique                           |                                                          |                                                             | <0.001         |
| Open                                         | 523 (31.9)                                               | 1109 (16.8)                                                 |                |
| Laparoscopic                                 | 243 (14.8)                                               | 1222 (18.5)                                                 |                |
| Laparo-assisted                              | 26 (1.6)                                                 | 108 (1.6)                                                   |                |
| Peripheral                                   | 285 (17.4)                                               | 1171 (17.7)                                                 |                |

|                                           | <b>Anaemia</b>    | <b>No anaemia</b> |                |
|-------------------------------------------|-------------------|-------------------|----------------|
|                                           | ♀: Hb < 12        | ♀: Hb ≥ 12        | <b>P value</b> |
|                                           | ♂: Hb < 13        | ♂: Hb ≥ 13        |                |
|                                           | <b>(n = 1644)</b> | <b>(n = 6617)</b> |                |
| Other                                     | 565 (34.4)        | 3000 (45.4)       |                |
| Use of epidural anaesthesia               | 154 (9.4)         | 297 (4.5)         | <0.001         |
| Antibiotic prophylaxis                    | 1286 (78.3)       | 4628 (70.0)       | <0.001         |
| Duration of anaesthesia, minutes          | 120.5 [80 to 195] | 105.0 [70 to 160] | <0.001         |
| Duration of surgery, minutes              | 90.0 [55 to 153]  | 75.0 [45 to 123]  | <0.001         |
| Total fluid intake, L                     | 1.5 [1.0 to 2.0]  | 1.0 [0.8 to 1.6]  | <0.001         |
| Crystalloids, L                           | 1.1 [1.0 to 2.0]  | 1.0 [0.8 to 1.5]  | <0.001         |
| Colloids, L                               | 0.5 [0.3 to 0.5]  | 0.5 [0.0 to 0.5]  | <0.001         |
| Red blood cell transfusion during surgery | 173 (10.5)        | 144 (2.2)         | <0.001         |

Data presented as median [IQR 25 – 75] or N (%). The group with anaemic patients includes all anaemic patients. ARISCAT, Assess Respiratory Risk in Surgical Patients in Catalonia score; COPD, chronic obstructive pulmonary disease; Hb, haemoglobin. RBC, red blood cell; ♀, female patients; ♂, male patients.

eTable 2: Baseline and intraoperative characteristics matched cohort (sensitivity analysis)

|                                              | <b>Anaemia</b><br>♀: Hb < 12<br>♂: Hb < 13<br>(n = 900) | <b>No anaemia</b><br>♀: Hb ≥ 12<br>♂: Hb ≥ 13<br>(n = 1636) | <b>P value</b> |
|----------------------------------------------|---------------------------------------------------------|-------------------------------------------------------------|----------------|
| Age, years                                   | 57.0 [43.0 to 70.0]                                     | 56.5 [43.0 to 67.0]                                         | 0.039          |
| Female gender                                | 381 (42.3)                                              | 735 (44.9)                                                  | 0.224          |
| Body mass index, kg m <sup>-2</sup>          | 25.5 [22.6 to 29.0]                                     | 25.9 [23.0 to 29.4]                                         | 0.029          |
| ASA                                          | 2.0 [2.0 to 3.0]                                        | 2.0 [2.0 to 3.0]                                            | 0.023          |
| Anaemia category                             |                                                         |                                                             | <0.001         |
| No anaemia (Hb >12♀; >13♂)                   | 0 (0.0)                                                 | 1636 (100.0)                                                |                |
| Mild anaemia (Hb 11–11.9♀; 11–12.9♂)         | 626 (69.6)                                              | 0 (0.0)                                                     |                |
| Moderate anaemia (Hb 8–10.9)                 | 268 (29.8)                                              | 0 (0.0)                                                     |                |
| Severe anaemia (Hb<8)                        | 6 (0.7)                                                 | 0 (0.0)                                                     |                |
| ARISCAT without anaemia                      | 18.0 [11.0 - 34.0]                                      | 18.0 [8.0 - 31.2]                                           | 0.163          |
| Functional status                            |                                                         |                                                             | 0.400          |
| Independent                                  | 799 (88.8)                                              | 1478 (90.3)                                                 |                |
| Partially dependent                          | 88 (9.8)                                                | 134 (8.2)                                                   |                |
| Totally dependent                            | 13 (1.4)                                                | 24 (1.5)                                                    |                |
| COPD                                         | 72 (8.0)                                                | 109 (6.7)                                                   | 0.242          |
| Cancer                                       | 71 (7.9)                                                | 105 (6.4)                                                   | 0.189          |
| Chronic kidney failure                       | 63 (7.0)                                                | 78 (4.8)                                                    | 0.024          |
| Heart failure                                | 88 (9.8)                                                | 125 (7.6)                                                   | 0.075          |
| Preoperative red blood cell transfusion      | 2 (0.2)                                                 | 4 (0.2)                                                     | 1.000          |
| Preoperative haemoglobin, g dL <sup>-1</sup> | 11.4 [10.7 to 11.9]                                     | 14.0 [13.2 to 15.0]                                         | <0.001         |
| Condition surgery                            |                                                         |                                                             | 0.959          |
| Elective                                     | 767 (85.2)                                              | 1400 (85.6)                                                 |                |
| Urgency                                      | 105 (11.7)                                              | 188 (11.5)                                                  |                |
| Emergency                                    | 28 (3.1)                                                | 48 (2.9)                                                    |                |
| Surgical technique                           |                                                         |                                                             | 0.938          |
| Open                                         | 262 (29.1)                                              | 459 (28.1)                                                  |                |
| Laparoscopic                                 | 147 (16.3)                                              | 267 (16.3)                                                  |                |
| Laparo-assisted                              | 17 (1.9)                                                | 37 (2.3)                                                    |                |
| Peripheral                                   | 153 (17.0)                                              | 273 (16.7)                                                  |                |
| Other                                        | 321 (35.7)                                              | 600 (36.7)                                                  |                |
| Use of epidural anaesthesia                  | 82 (9.1)                                                | 130 (7.9)                                                   | 0.348          |
| Antibiotic prophylaxis                       | 691 (76.8)                                              | 1215 (74.3)                                                 | 0.176          |

|                                           | <b>Anaemia</b>        | <b>No anaemia</b>     |                |
|-------------------------------------------|-----------------------|-----------------------|----------------|
|                                           | ♀: Hb < 12            | ♀: Hb ≥ 12            | <b>P value</b> |
|                                           | ♂: Hb < 13            | ♂: Hb ≥ 13            |                |
|                                           | <b>(n = 900)</b>      | <b>(n = 1636)</b>     |                |
| Duration of anaesthesia, minutes          | 120.0 [80.0 to 190.0] | 120.0 [78.0 to 190.0] | 0.320          |
| Duration of surgery, minutes              | 90.0 [55.0 to 148.0]  | 87.0 [54.0 to 149.8]  | 0.314          |
| Total fluid intake, L                     | 1.5 [1.0 to 2.0]      | 1.1 [1.0 to 2.0]      | 0.122          |
| Crystalloids, L                           | 1.1 [1.0 to 2.0]      | 1.0 [1.0 to 2.0]      | 0.095          |
| Colloids, L                               | 0.5 [0.8 to 0.5]      | 0.5 [0.3 to 0.5]      | 0.158          |
| Red blood cell transfusion during surgery | 47 (5.2)              | 84 (5.1)              | 0.999          |

Data presented as median [IQR 25 – 75] or N (%). The group with anaemic patients includes all anaemic patients. ARISCAT, Assess Respiratory Risk in Surgical Patients in Catalonia score; COPD, chronic obstructive pulmonary disease; Hb, haemoglobin. RBC, red blood cell; ♀, female patients; ♂, male patients.

eTable 3: Patient outcomes and adverse events unmatched cohort (sensitivity analysis)

|                                            | <b>Anaemia</b>    | <b>No anaemia</b> |                |
|--------------------------------------------|-------------------|-------------------|----------------|
|                                            | ♀: Hb < 12        | ♀: Hb ≥ 12        | <b>P value</b> |
|                                            | ♂: Hb < 13        | ♂: Hb ≥ 13        |                |
|                                            | <b>(n = 1644)</b> | <b>(n = 6617)</b> |                |
| Hospital length of stay, days              | 4.0 [2.0 to 8.0]  | 3.0 [1.0 to 5.0]  | <0.001         |
| In-hospital mortality                      | 25 (1.7)          | 28 (0.5)          | <0.001         |
| Intraoperative adverse events <sup>a</sup> | 652 (39.7)        | 2161 (32.7)       | <0.001         |
| Hypotension                                | 517 (31.5)        | 1641 (24.8)       | <0.001         |
| Need of vasopressor                        | 451 (27.5)        | 1353 (20.5)       | <0.001         |
| Arrhythmia                                 | 15 (0.9)          | 38 (0.6)          | 0.173          |
| PPCs <sup>b</sup>                          | 264 (16.4)        | 633 (9.7)         | <0.001         |
| Need of oxygen                             | 207 (12.9)        | 516 (7.9)         | <0.001         |
| Respiratory failure                        | 50 (3.1)          | 102 (1.6)         | <0.001         |
| Need of mechanical ventilation             | 36 (2.2)          | 65 (1.0)          | <0.001         |
| ARDS                                       | 5 (0.3)           | 4 (0.1)           | 0.022          |
| Pneumonia                                  | 14 (0.9)          | 22 (0.3)          | 0.007          |
| Barotrauma                                 | 3 (0.2)           | 8 (0.1)           | 0.802          |

Data presented as median [IQR 25 to 75] or number (*n* (%)). <sup>a</sup> Total intraoperative AEs: number and proportion of patients who developed at least one AE. <sup>b</sup> Total PPCs: number and proportion of patients who developed at least one PPC. AEs, adverse events; ARDS, adult respiratory distress syndrome; Hb, haemoglobin; PPCs, postoperative pulmonary complications; ♀, female patients; ♂, male patients.

eTable 4: Patient outcomes and adverse events matched cohort (sensitivity analysis)

|                                 | <b>Anaemia</b>       | <b>No anaemia</b> |                |
|---------------------------------|----------------------|-------------------|----------------|
|                                 | ♀: <b>Hb &lt; 12</b> | ♀: <b>Hb ≥ 12</b> | <b>P value</b> |
|                                 | ♂: <b>Hb &lt; 13</b> | ♂: <b>Hb ≥ 13</b> |                |
|                                 | <b>(n = 900)</b>     | <b>(n = 1636)</b> |                |
| Hospital length of stay, days   | 4.0 [2.0 to 6.0]     | 3.0 [1.0 to 6.0]  | <0.001         |
| In-hospital mortality           | 6 (0.7)              | 8 (0.5)           | 0.764          |
| Intraoperative AEs <sup>a</sup> |                      |                   |                |
| Hypotension                     | 340 (37.8)           | 610 (37.3)        | 0.833          |
| Need of vasopressor             | 268 (29.8)           | 463 (28.3)        | 0.455          |
| Arrhythmia                      | 232 (25.8)           | 416 (25.4)        | 0.879          |
|                                 | 4 (0.4)              | 13 (0.8)          | 0.436          |
| PPCs <sup>b</sup>               |                      |                   |                |
| Need of oxygen                  | 141 (15.7)           | 215 (13.2)        | 0.091          |
| Respiratory failure             | 116 (12.9)           | 166 (10.2)        | 0.042          |
| Need of mechanical ventilation  | 24 (2.7)             | 38 (2.3)          | 0.688          |
| ARDS                            | 15 (1.7)             | 21 (1.3)          | 0.546          |
| Pneumonia                       | 1 (0.1)              | 2 (0.1)           | 1.000          |
| Barotrauma                      | 5 (0.6)              | 13 (0.8)          | 0.660          |
|                                 | 2 (0.2)              | 4 (0.2)           | 1.000          |

Data presented as median [IQR 25 to 75] or number (*n* (%)). <sup>a</sup> Total intraoperative AEs: number and proportion of patients who developed at least one AE. <sup>b</sup> Total PPCs: number and proportion of patients who developed at least one PPC. AEs, adverse events; ARDS, adult respiratory distress syndrome; Hb, haemoglobin; PPCs, postoperative pulmonary complications; ♀, female patients; ♂, male patients.



eTable 5: Different models evaluating preoperative anaemia and length of hospital stay in the matched cohort of moderate and severe anaemia

| <b>Model</b>                                                                                                                                                                    | <b>Mean difference (95%CI)</b> | <b>P value</b> |
|---------------------------------------------------------------------------------------------------------------------------------------------------------------------------------|--------------------------------|----------------|
| Mixed-effect linear regression model adjusted for the CBPS as a linear term                                                                                                     | 1.12 (0.57 to 1.68)            | < 0.001        |
| Mixed-effect linear regression model adjusted for the CBPS as decile categories                                                                                                 | 1.10 (0.57 to 1.63)            | < 0.001        |
| Inverse-probability-of-treatment-weighted mixed-effect linear regression model with the weights $1/cbps$ for anaemic individuals and $1/(1 - cbps)$ for non-anaemic individuals | 2.48 (2.47 to 2.48)            | < 0.001        |
| Standardized mortality ratio-weighted mixed-effect linear regression model with weights of 1 for anaemic and $cbps/(1 - cbps)$ for non-anaemic individuals                      | 0.95 (0.95 to 0.96)            | < 0.001        |
| Mixed-effect linear regression model in the matched cohort                                                                                                                      | 1.48 (0.13 to 2.82)            | 0.031          |

CBPS, covariate balanced propensity score

eFigure 1: Probability of hospital discharge in the unmatched cohort

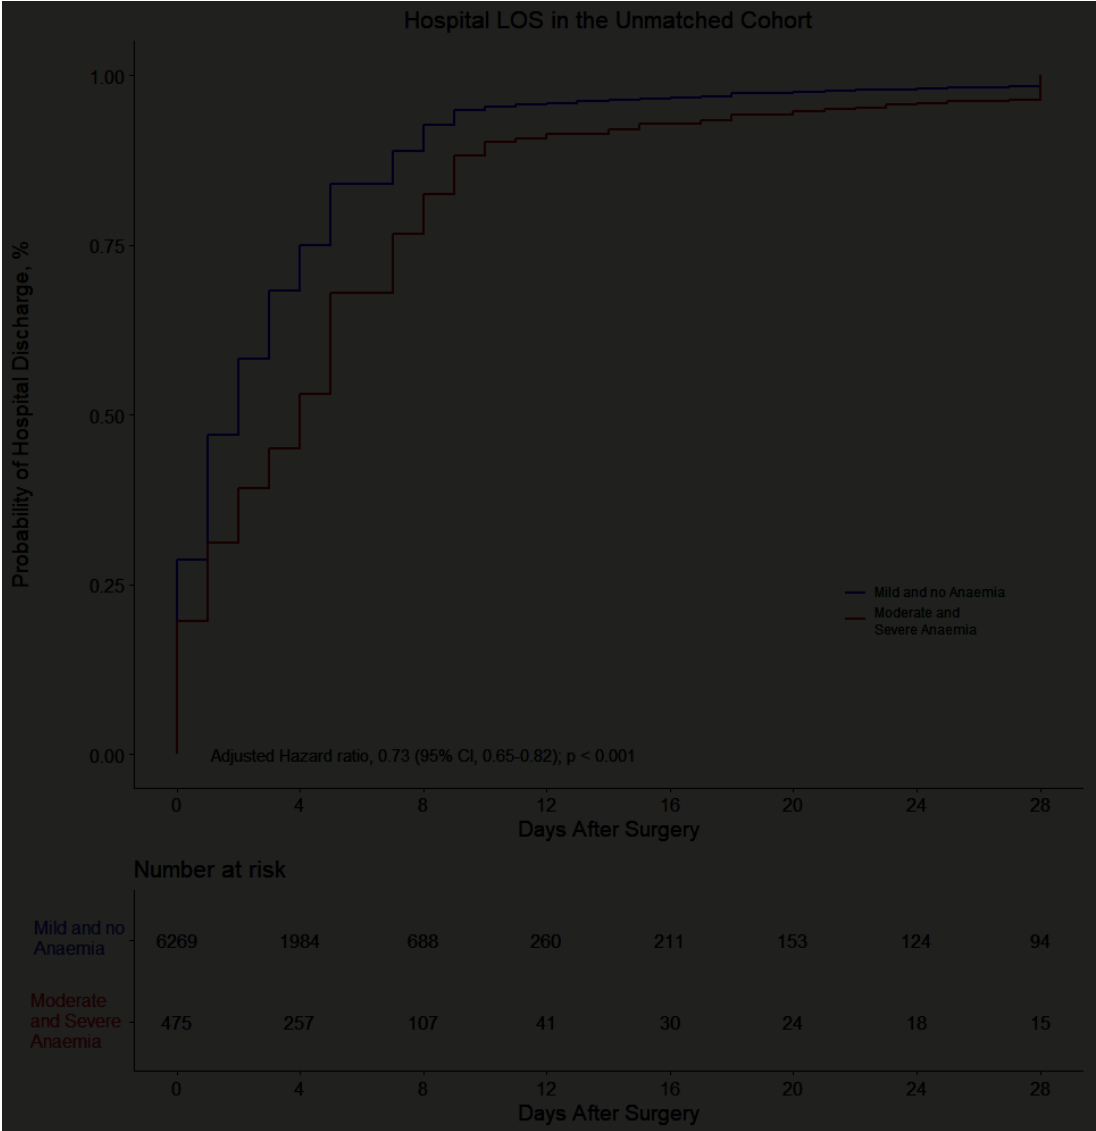

eFigure 2: Probability of survival in unmatched and matched anaemic and non-anaemic patients

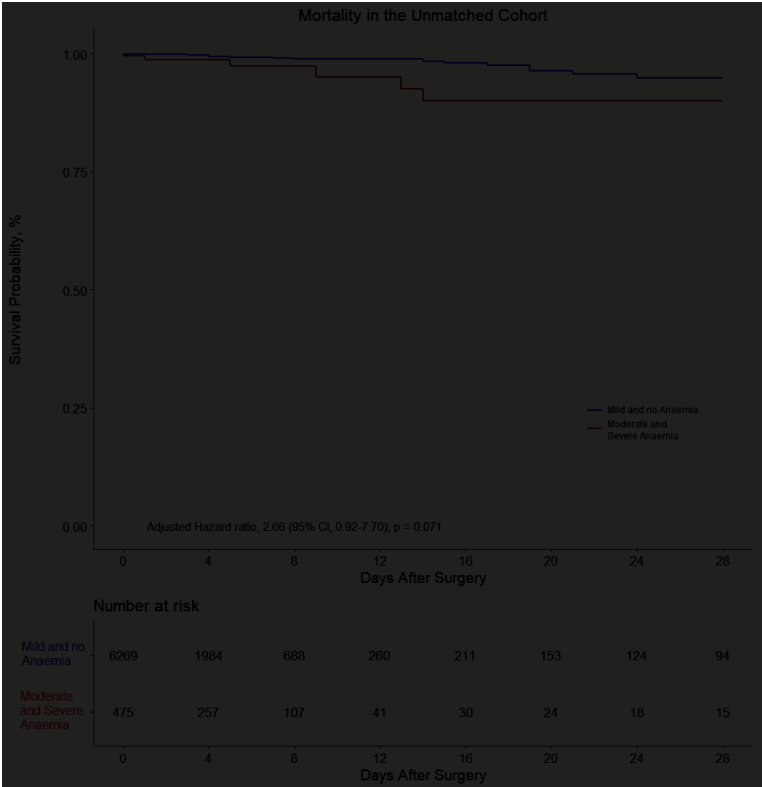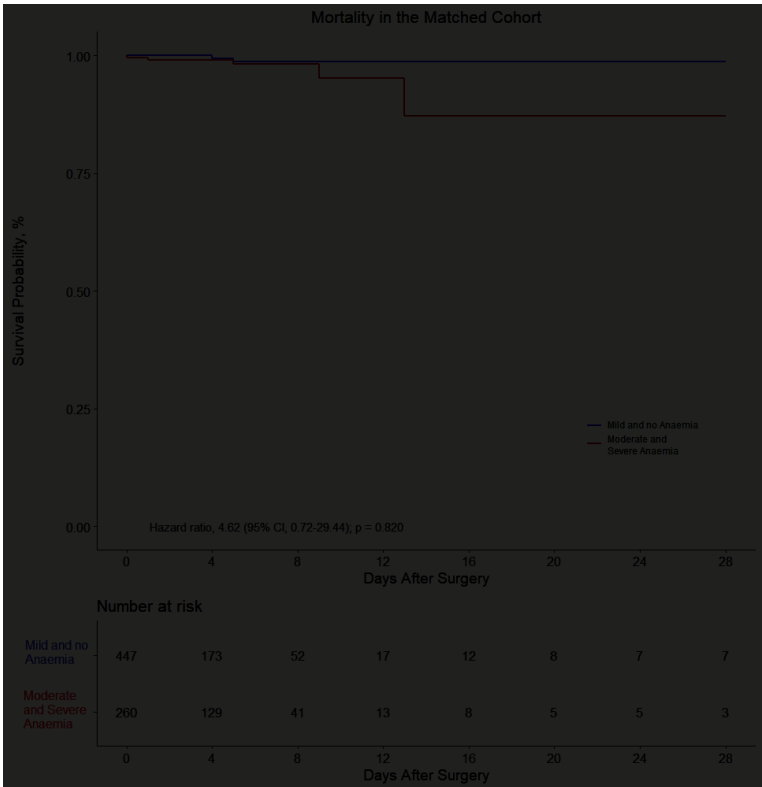

eFigure 3: Probability of hospital discharge in the unmatched cohort (sensitivity analysis)

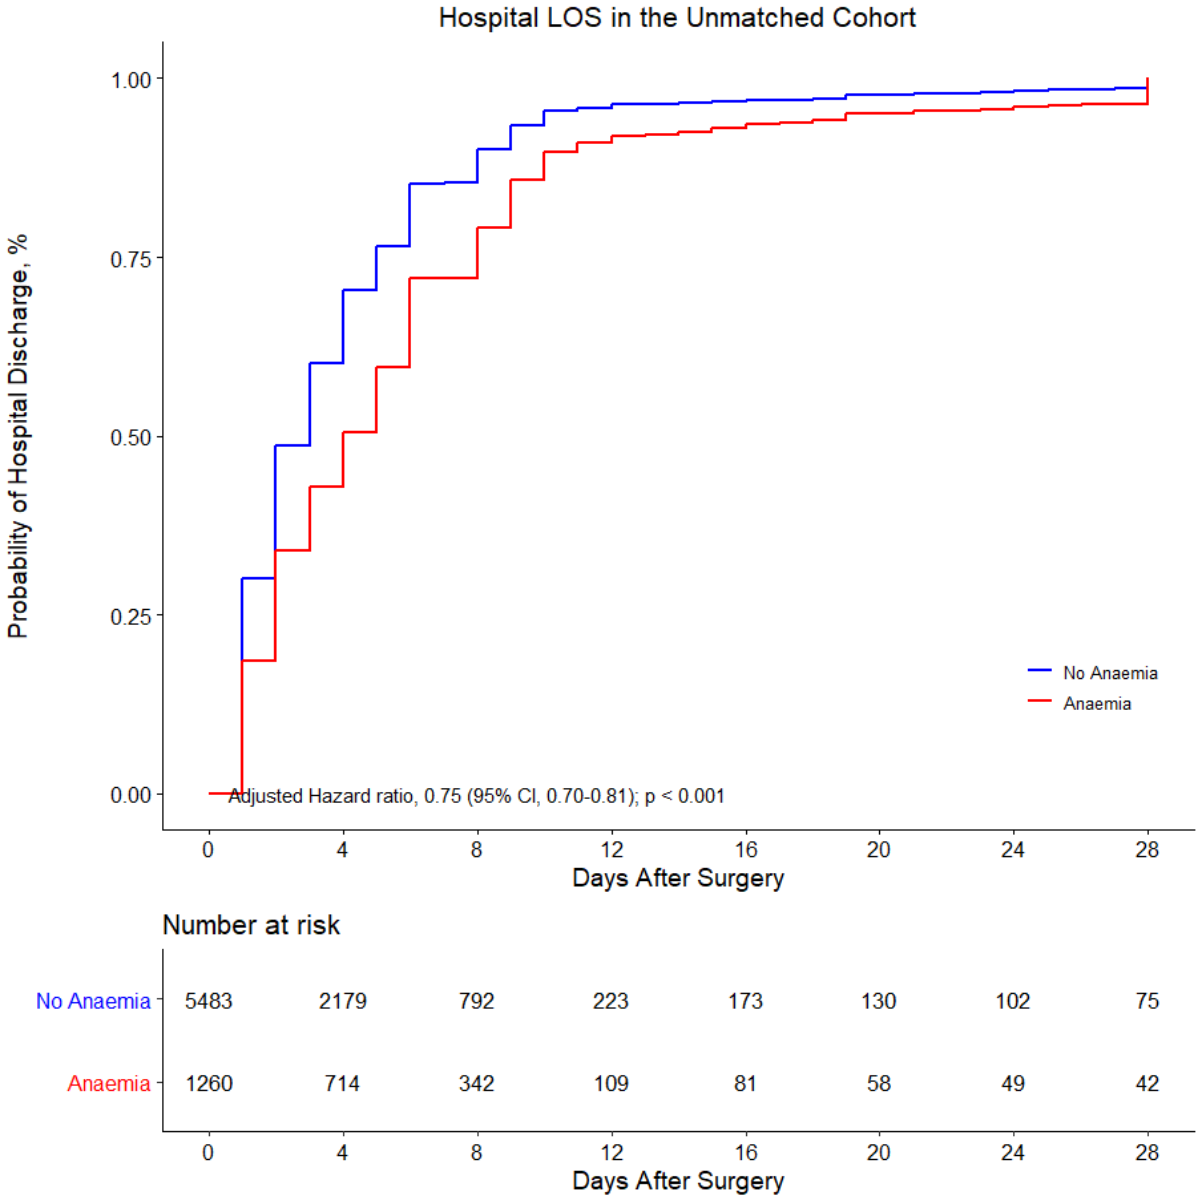

eFigure 4: Probability of survival in unmatched anaemic and non-anaemic patients (sensitivity analysis)

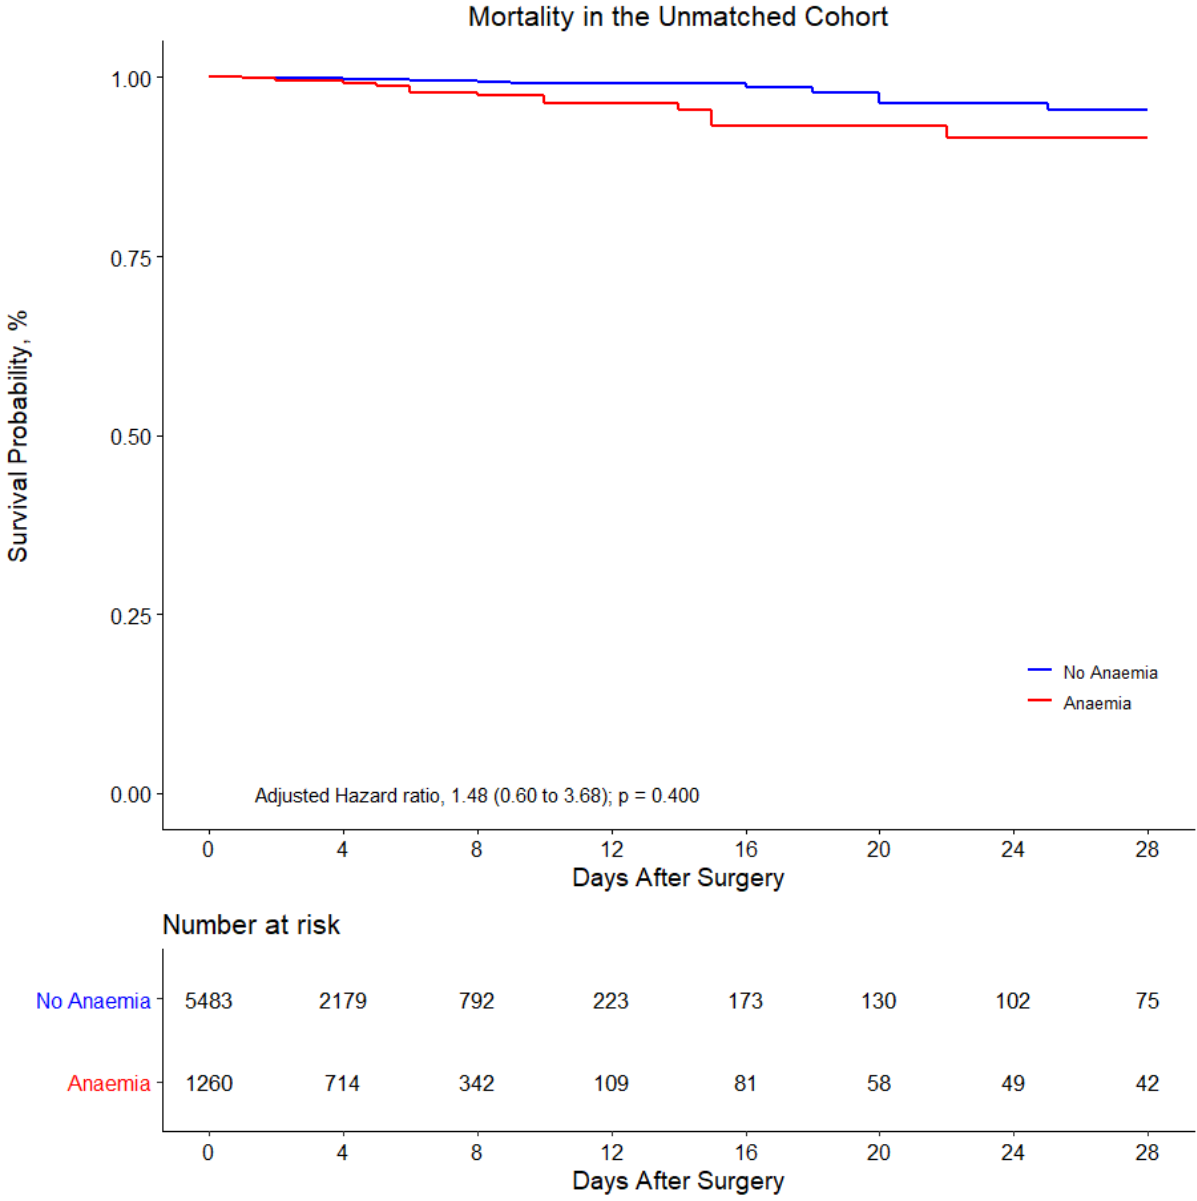

eFigure 5: Probability of hospital discharge in the matched cohort (sensitivity analysis)

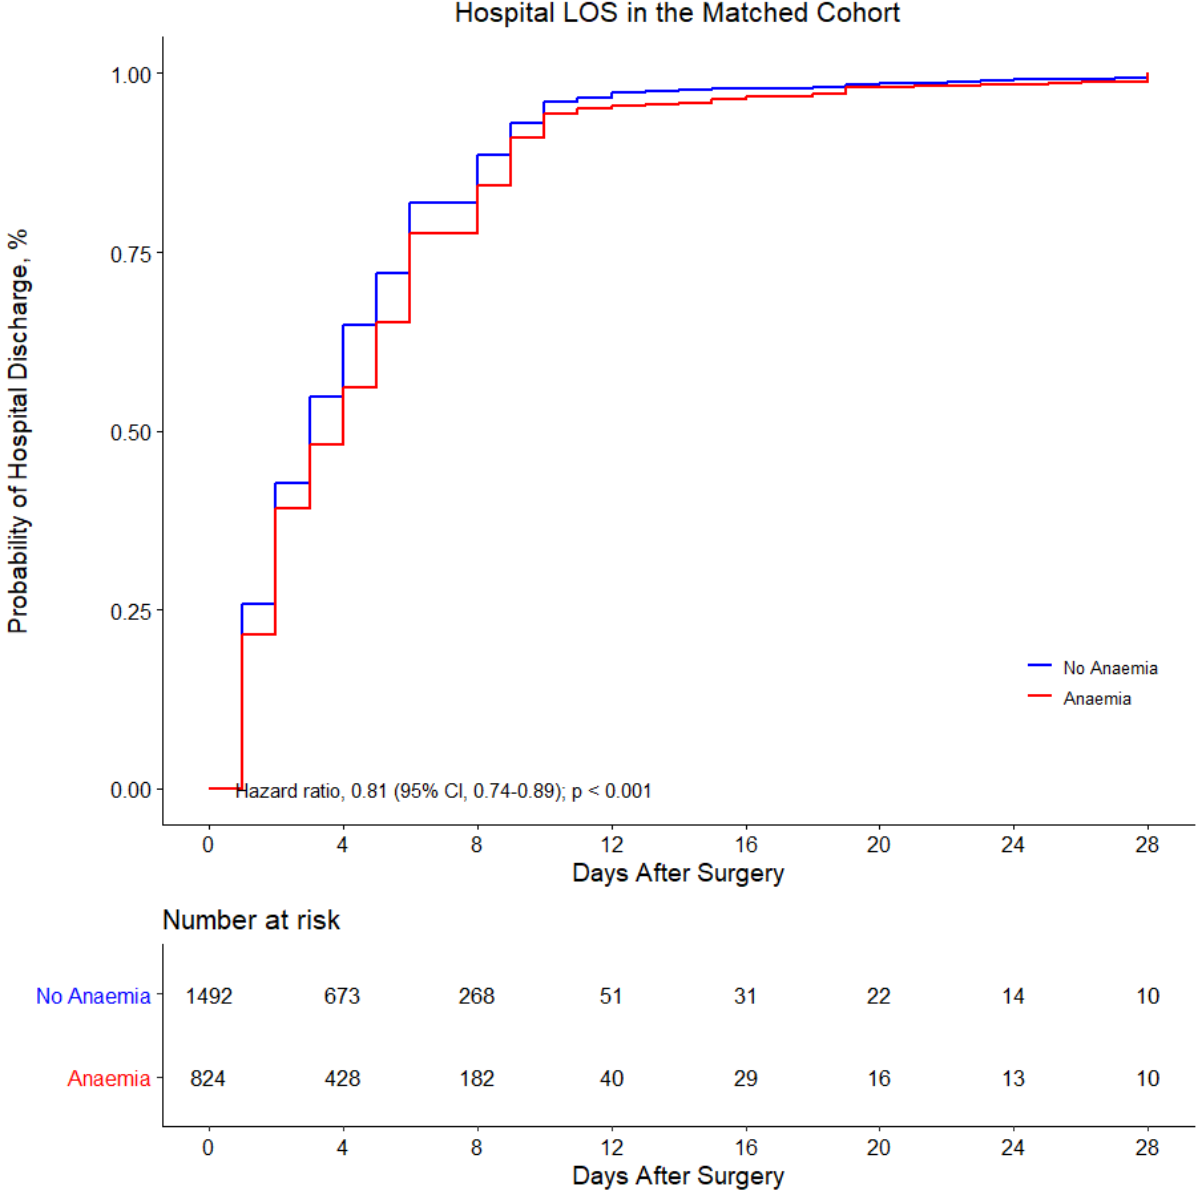

eFigure 6: Probability of survival in matched anaemic and non-anaemic patients (sensitivity analysis)

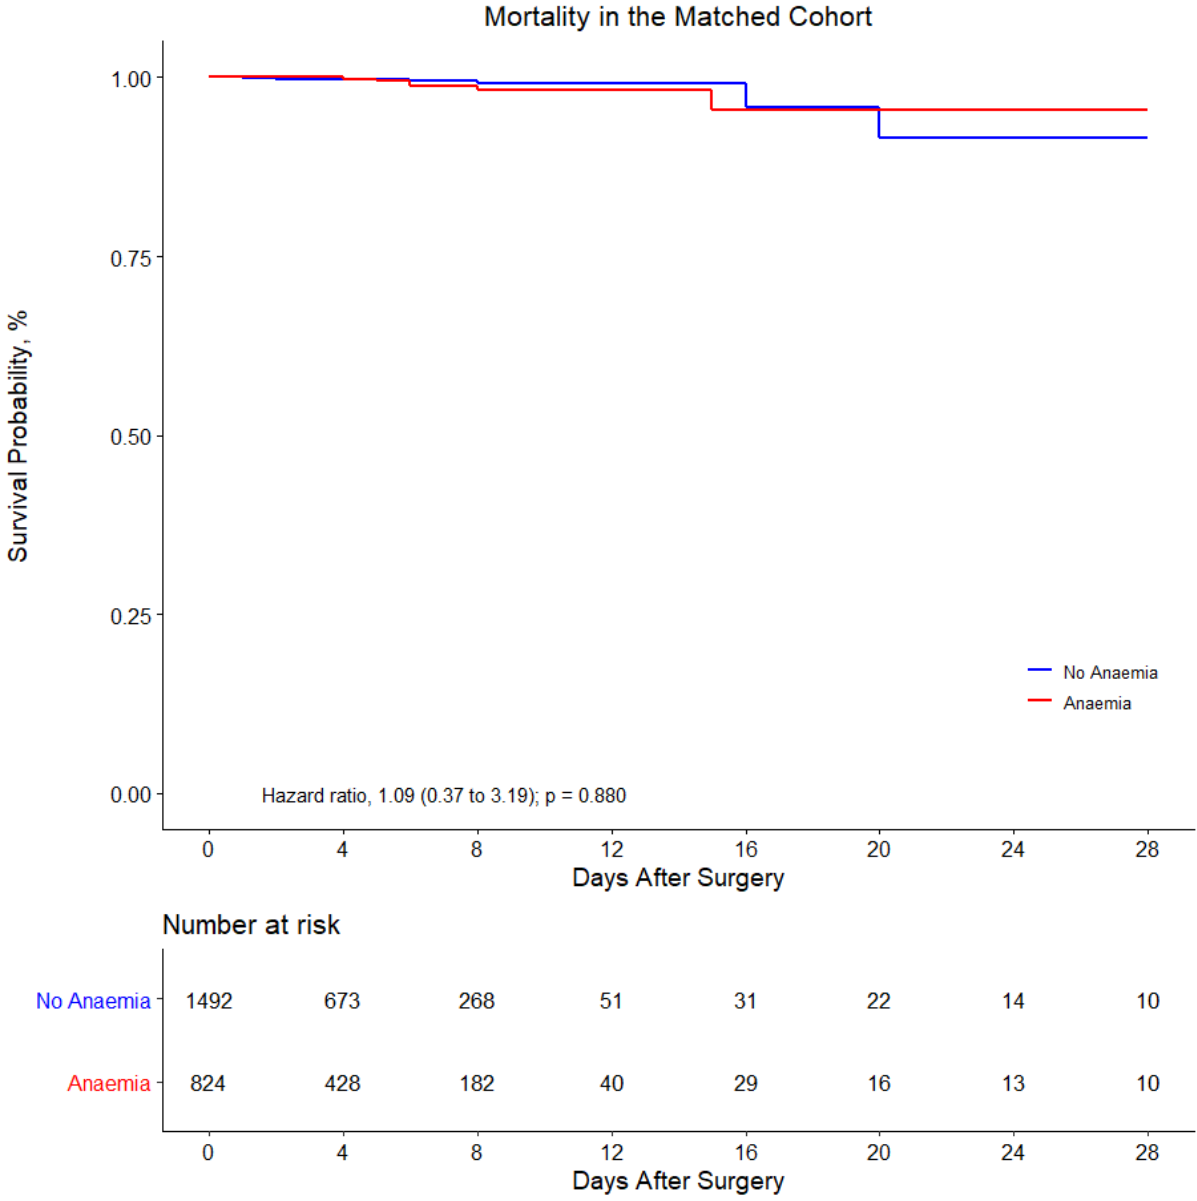

Supplement: NIHMS1862766-supplement-Suppl_1.pdf [file NIHMS1862766-supplement-Suppl_1.pdf]
